# Supplementary material
Source: PubMed Central journal article supplement (PMC7977944)
Supplement: ryct200086suppa1.pdf [file ryct200086suppa1.pdf]

**Table E1: MRI Scans in Patients with Abandoned Leads**

| # | Age | MRI Scan Region | MRI Date | Clinical Indication              | Ordering Specialty | Manufacturer | Device Type | Total Leads | Pacing Dependent | Abandoned Leads | Abandoned Lead Type and Location           | Reason for Abandoned Lead |
|---|-----|-----------------|----------|----------------------------------|--------------------|--------------|-------------|-------------|------------------|-----------------|--------------------------------------------|---------------------------|
| 1 | 58  | T Spine         | 1/15/16  | Neck Pain                        | Neurosurgery       | SJM          | ICD         | 2.5         | N                | 0.5             | RA pacing lead fragment                    | OHT                       |
| 1 | 58  | L-Spine         | 1/15/16  | Neck Pain                        | Neurosurgery       | SJM          | ICD         | 2.5         | N                | 0.5             | RA pacing lead fragment                    | OHT                       |
| 2 | 78  | T Spine         | 8/25/16  | Neck Pain                        | Cardiology         | MDT          | PPM         | 3.0         | N                | 1.0             | SVC coil                                   | OHT                       |
| 2 | 78  | Head            | 8/29/16  | Somnolence                       | Cardiology         | MDT          | PPM         | 3.0         | N                | 1.0             | SVC coil                                   | OHT                       |
| 2 | 78  | Head            | 8/29/16  | Somnolence                       | Cardiology         | MDT          | PPM         | 3.0         | N                | 1.0             | SVC coil                                   | OHT                       |
| 3 | 48  | Head            | 11/10/16 | Adenoma                          | Endocrinology      | None         | Explant     | 1.0         | N                | 0.5             | SVC coil                                   | OHT                       |
| 4 | 69  | Head            | 12/22/16 | Memory loss                      | HF/T-Plant         | None         | Explant     | 0.0         | N                | 2.0             | SVC coil fragment                          | OHT                       |
| 5 | 34  | Head            | 1/13/17  | CVA                              | HF/T-Plant         | Sorin        | PPM         | 2.0         | N                | 1.0             | SVC coil and part of RV                    | OHT                       |
| 6 | 61  | Head            | 6/1/17   | Memory loss/vision loss          | HF/T-Plant         | None         | Explant     | 1.0         | N                | 1.0             | SVC coil and part of RV defibrillator lead | OHT                       |
| 6 | 61  | Other Ortho     | 10/19/17 | Adhesive bursitis                | Ortho              | None         | Explant     | 1.0         | N                | 1.0             | SVC coil and part of RV defibrillator lead | OHT                       |
| 6 | 61  | Other Ortho     | 12/8/17  | pain                             | FamPract           | None         | Explant     | 1.0         | N                | 1.0             | defibrillator lead                         | OHT                       |
| 6 | 62  | C-Spine         | 6/14/18  | Head pain/cervical radiculopathy | Ortho              | None         | Explant     | 1.0         | N                | 1.0             | SVC coil and part of RV defibrillator lead | OHT                       |
| 6 | 62  | Other Ortho     | 8/30/18  | Left shoulder/neck               | Cardiology         | None         | Explant     | 1.0         | N                | 1.0             | SVC coil and part of RV defibrillator lead | OHT                       |
| 7 | 82  | C-Spine         | 12/19/17 | Neck Pain                        | Int-Med            |              | Explant     | 1.0         | N                | 1.0             | RV pacing lead                             | Explanted generator       |
| 7 | 68  | Cardiac         | 12/7/17  | R/O Infiltrative process         | HF/T-Plant         | None         | Explant     | 0.5         | N                | 0.5             | Retained RV epicardial pacing lead         | OHT                       |

|    |    |             |          |                            |              |      |         |     |   |     |                                     |                         |
|----|----|-------------|----------|----------------------------|--------------|------|---------|-----|---|-----|-------------------------------------|-------------------------|
| 8  | 94 | Head        | 2/16/18  | TIA                        | Neurology    | MDT  | PPM     | 4.0 | N | 2.0 | RA and RV pacing lead               | Retained defective lead |
| 8  | 94 | Head        | 2/17/18  | TIA                        | Neurology    | MDT  | PPM     | 4.0 | N | 2.0 | RA and RV pacing lead               | Retained defective lead |
| 8  | 94 | C-Spine     | 2/18/18  | TIA                        | Neurology    | MDT  | PPM     | 4.0 | N | 2.0 | RA and RV pacing lead               | Retained defective lead |
| 9  | 74 | Head        | 5/10/18  | Upper extremity weakness   | Neurology    | None | Explant | 3.0 | N | 3.0 | RV lead, coil, and epicardial patch | Explanted generator     |
| 10 | 76 | L-Spine     | 8/21/18  | Lumbar radiculopathy       | Neurosurgery | SJM  | CRT-D   | 5.0 | Y | 2.0 | RA and RV pacing lead               | Contralateral implant   |
| 11 | 74 | Cardiac     | 12/28/18 | LV thrombus                | Cardiology   | MDT  | CRT-D   | 4.0 | Y | 1.0 | RV pacing lead                      | Device upgrade          |
| 12 | 83 | Head        | 3/1/19   | CVA                        | hospitalist  | MDT  | CRT-D   | 5.0 | Y | 2.0 | RA and RV pacing lead               | Contralateral implant   |
| 13 | 47 | Other Ortho | 4/30/19  | Left knee pain             | Ortho        | MDT  | PPM     | 4.0 | N | 2.0 | Pacing leads                        | Device upgrade          |
| 14 | 56 | L-Spine     | 4/30/19  | Acute low back pain        | Sports Med   | MDT  | CRT-D   | 4.0 | Y | 1.0 | RV defibrillator lead               | Retained defective lead |
| 15 | 79 | Cardiac     | 5/21/19  | Preablation for atrial fib | Cardiology   | MDT  | CRT-D   | 4.0 | Y | 1.0 | CS pacing lead                      | Retained defective lead |

CS = coronary sinus, CVA = cerebrovascular accident, CRT-D = cardiac resynchronization therapy defibrillator, HF = heart failure, LV = left ventricle, MDT = Medtronic, OHT = orthotopic heart transplant, PPM = pacemaker, RA = right atrium, RV = right ventricle, SJM = Abbott/St. Jude Medical, SVC = superior vena cava, TIA = transient ischemic attack, T-Plant = transplant.
